# Supplementary figures and images for: Phylogenetic Distribution and Evolutionary History of Bacterial DEAD-Box Proteins
Source: PubMed Central journal article supplement — J Mol Evol. 2011 Mar 25;72(4):413–31. doi: 10.1007/s00239-011-9441-8 (PMC3093544; doi:10.1007/s00239-011-9441-8), 2011-03-25

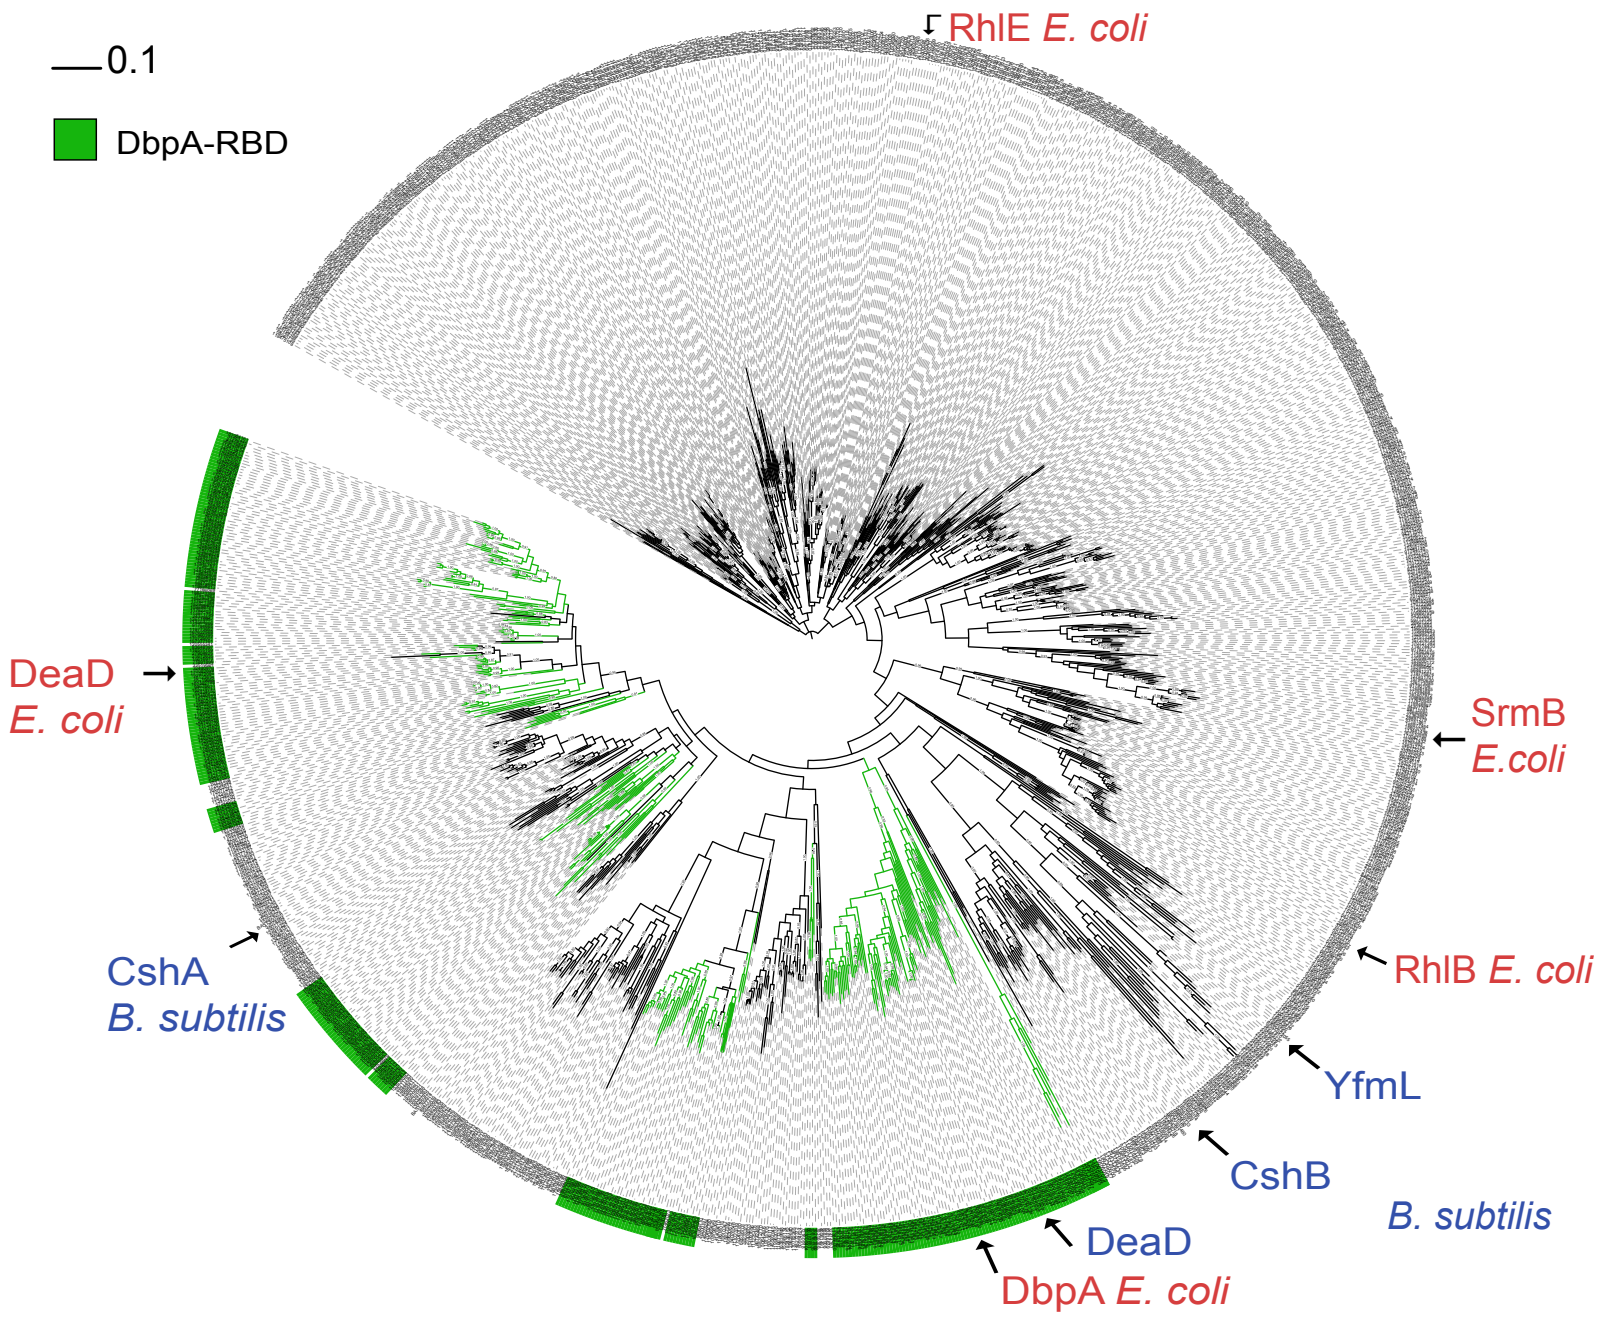

Figure 1S.  
López-Ramírez *et al.*

Supplement: 239_2011_9441_MOESM1_ESM.pdf [file 239_2011_9441_MOESM1_ESM.pdf]

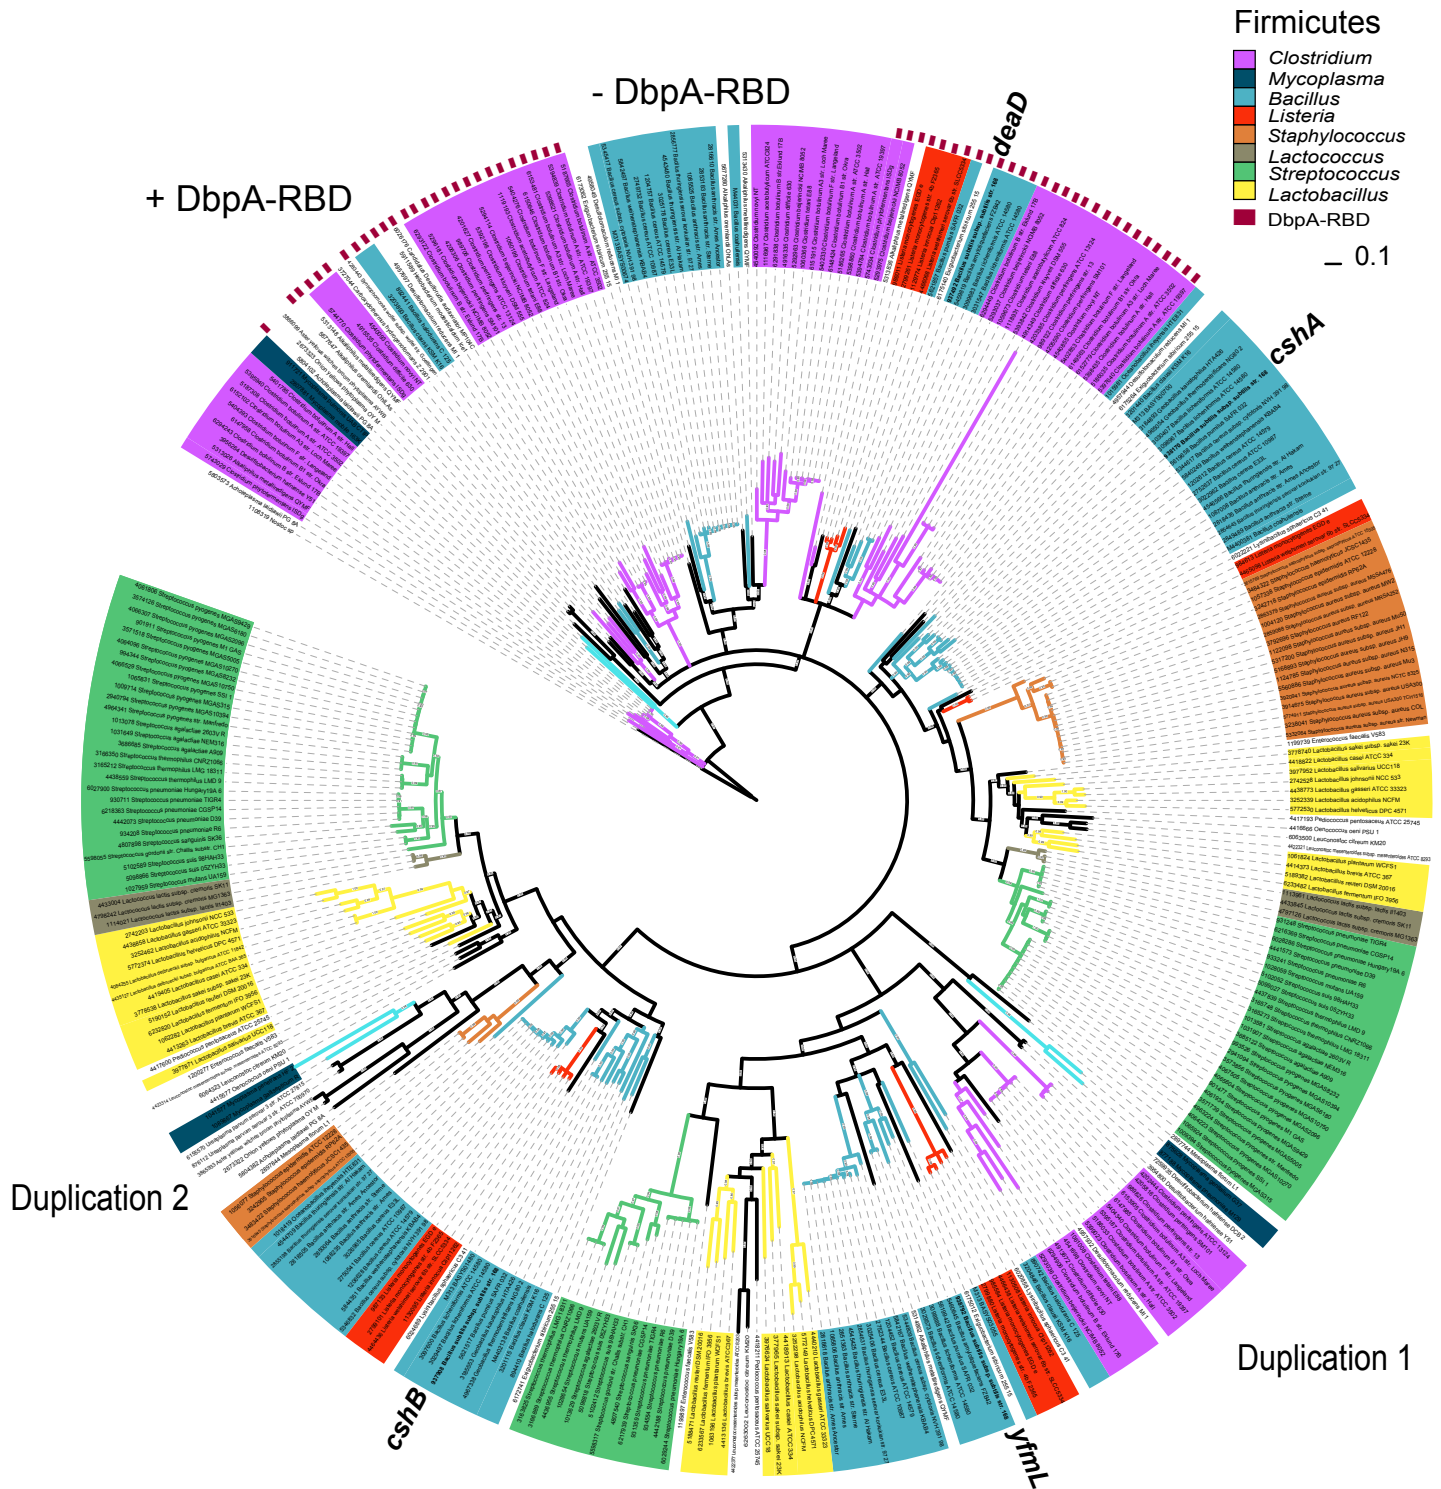

Figure 2S.  
López-Ramírez *et al.*

Supplement: 239_2011_9441_MOESM2_ESM.pdf [file 239_2011_9441_MOESM2_ESM.pdf]

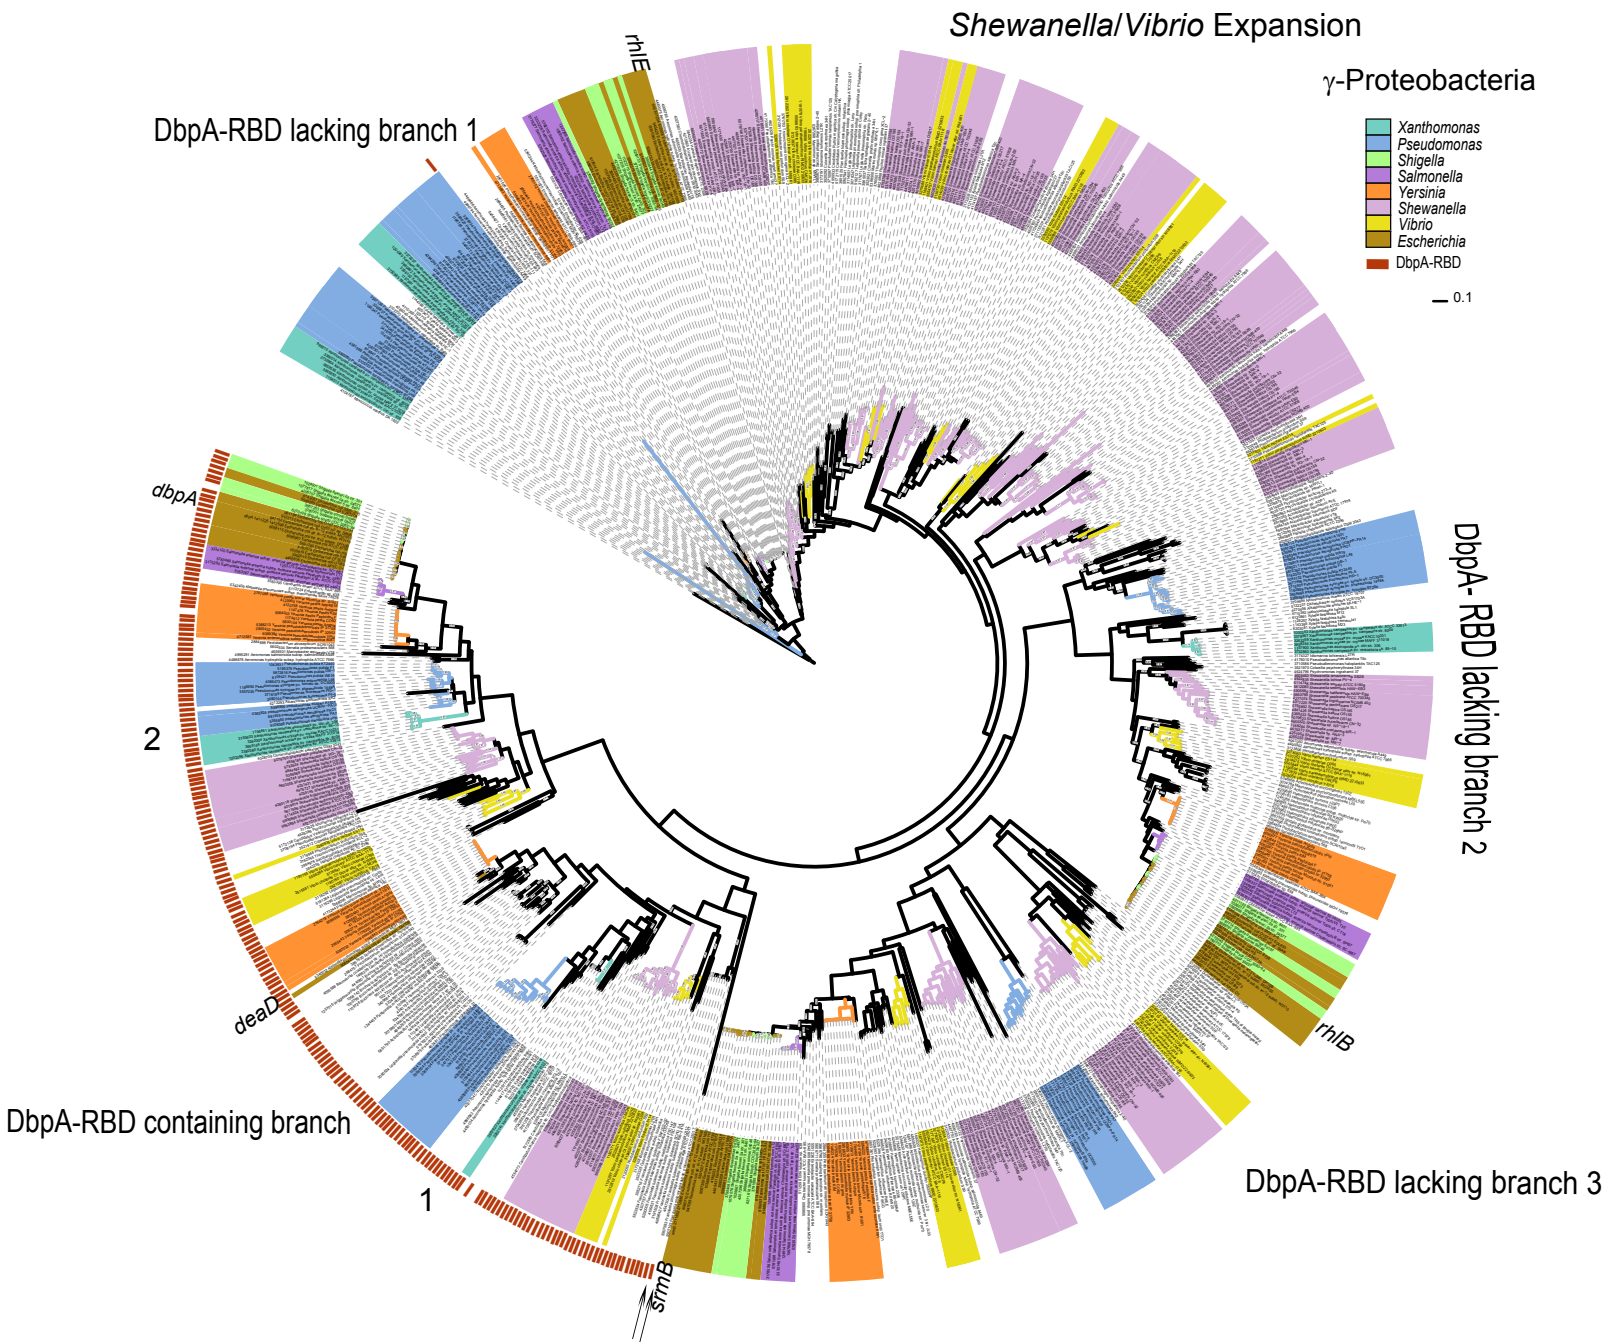

Figure 3S.  
López-Ramírez *et al.*

Supplement: 239_2011_9441_MOESM3_ESM.pdf [file 239_2011_9441_MOESM3_ESM.pdf]

DEAD-box gene number

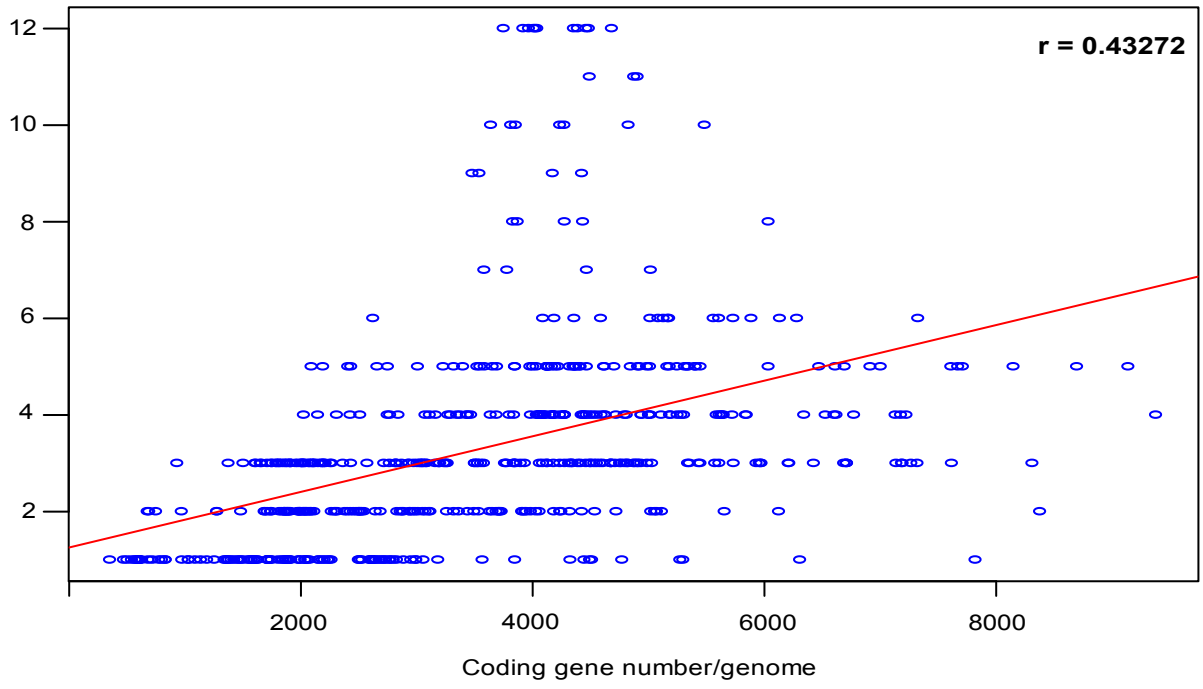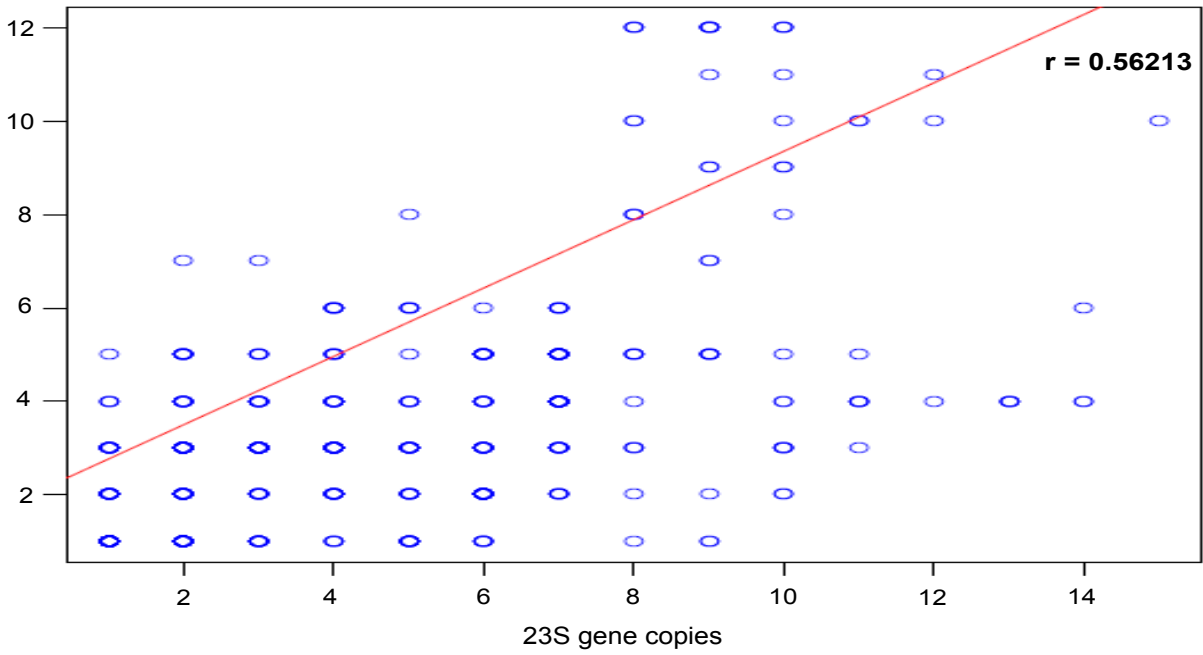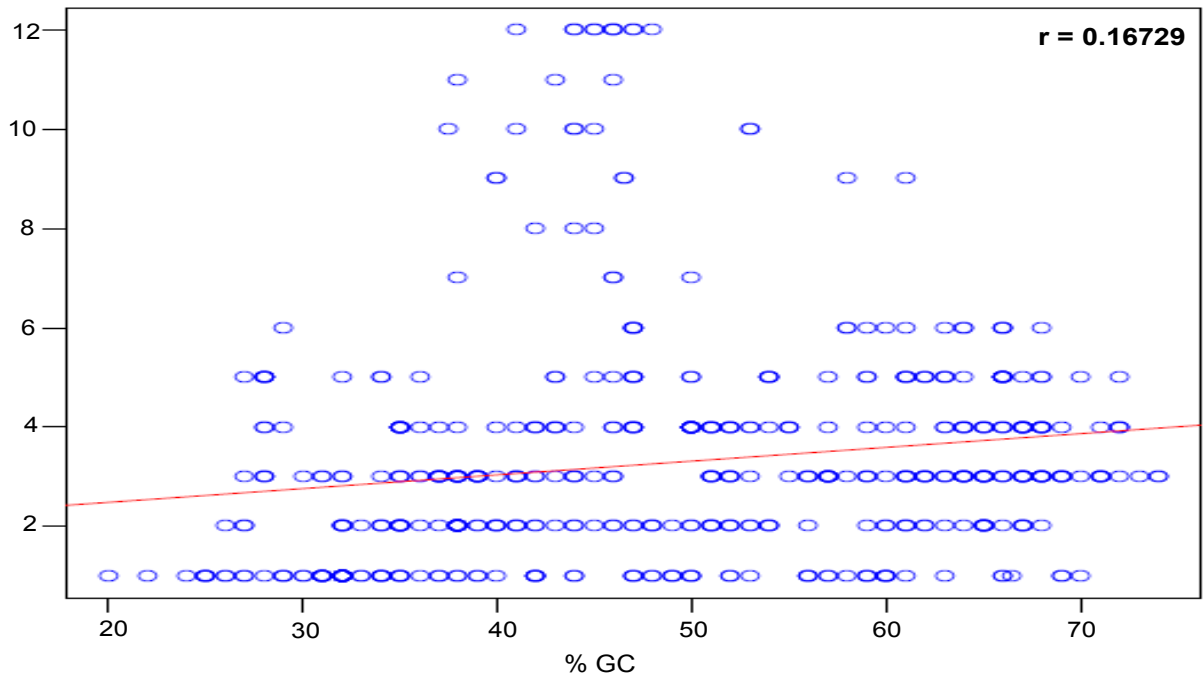

Supplement: 239_2011_9441_MOESM4_ESM.pdf [file 239_2011_9441_MOESM4_ESM.pdf]
